# Supplementary material
Source: publisher figshare collection journal article supplement (https://acs.figshare.com/ndownloader/files/4178335)

# **Graphite Coated Paper as Substrate for High Sensitive Analysis in Ambient Surface-Assisted Laser Desorption/Ionization Mass Spectrometry**

Jialing Zhang, Ze Li, Chengsen Zhang, Baosheng Feng, Zhigui Zhou, Yu Bai, and Huwei Liu\*

[Supporting information](#)

**Table S1** Fifty one detected compounds which were examined under visible laser (532 nm).

| Ion mode          | Samples                                 | Concentration (mg/mL) | Molecular weight | Detected ion | Plasma temperature | S/N of white band | S/N of black band |
|-------------------|-----------------------------------------|-----------------------|------------------|--------------|--------------------|-------------------|-------------------|
| Negative ion mode | Tetradecanoic acid                      | <u>5</u>              | 228              | 227          | 25 °C              | 2                 | 262               |
|                   | Eicosanoic acid                         | <u>2</u>              | 312              | 311          | 25 °C              | <1                | 127               |
|                   | Stearic acid                            | <u>5</u>              | 284              | 283          | 25 °C              | <1                | 68                |
|                   | Hexadecanoic acid                       | <u>5</u>              | 256              | 255          | 25 °C              | 4                 | 98                |
|                   | Decanedioic acid                        | <u>10</u>             | 202              | 201          | 25 °C              | 1                 | 352               |
|                   | Hippuric acid                           | <u>10</u>             | 179              | 178          | 25 °C              | 1                 | 81                |
|                   | Barbituric acid                         | <u>1</u>              | 128              | 127          | 25 °C              | 2                 | 37                |
|                   | (4-amino-benzoylamino)-acetic acid      | <u>10</u>             | 194              | 193          | 25 °C              | 3                 | 106               |
|                   | m-hydroxybenzoic acid                   | <u>5</u>              | 138              | 137          | 25 °C              | <1                | 172               |
|                   | o-hydroxybenzoic acid                   | <u>5</u>              | 138              | 137          | 25 °C              | <1                | 201               |
|                   | o- nitrobenzoic acid                    | <u>5</u>              | 167              | 166          | 25 °C              | 22                | 572               |
|                   | 2-(phenylamino) benzoic acid            | <u>5</u>              | 213              | 212          | 25 °C              | 5                 | 126               |
|                   | Cholic acid                             | <u>10</u>             | 408              | 407          | 400 °C             | <1                | 6                 |
|                   | Octadecylamine                          | <u>2</u>              | 269              | 270          | 25 °C              | 1                 | 593               |
|                   | Benzoin                                 | <u>10</u>             | 212              | 213          | 25 °C              | 6                 | 212               |
| Positive ion mode | Anthranone                              | <u>2</u>              | 194              | 195          | 25 °C              | 278               | 756               |
|                   | Benzanilide                             | <u>2</u>              | 197              | 198          | 25 °C              | 4                 | 342               |
|                   | 2-Cyclohexylamino-ethanesulfonic acid * | <u>5</u>              | 207              | 126          | 25 °C              | 1                 | 208               |
|                   | Theophylline                            | <u>10</u>             | 180              | 181          | 25 °C              | 2                 | 35                |
|                   | Methyltestosterone                      | <u>10</u>             | 302              | 302          | 25 °C              | <1                | 117               |
|                   | Chloramphenicol                         | <u>10</u>             | 322              | 323          | 25 °C              | <1                | 56                |
|                   | N-(3-acetyl-4-hydroxyphenyl) butyramide | <u>10</u>             | 221              | 222          | 25 °C              | 3                 | 497               |
|                   | 4-amino-3,5-dimethyl-1,2,4-triazole     | <u>10</u>             | 112              | 113          | 25 °C              | 2                 | 89                |
|                   | Artemisinin**                           | <u>10</u>             | 282              | 300          | 25 °C              | 2                 | 155               |
|                   | Rhodamin B                              | <u>10</u>             | 443              | 443          | 25 °C              | 4                 | 15                |
|                   | 9-aminoacridine                         | <u>10</u>             | 194              | 195          | 25 °C              | <1                | 50                |
|                   | Acetaminophen                           | <u>10</u>             | 151              | 152          | 25 °C              | <1                | 102               |
|                   | Progesterone                            | <u>10</u>             | 314              | 315          | 25 °C              | 2                 | 173               |
|                   | 4-aminoantipyrine                       | <u>10</u>             | 203              | 204          | 25 °C              | 6                 | 603               |
|                   | 1-benzoylnaphthalene                    | <u>5</u>              | 232              | 233          | 25 °C              | 48                | 842               |
|                   | 2-hydroxy-methyloxybenzophenone         | <u>10</u>             | 228              | 229          | 25 °C              | 22                | 989               |
|                   | Prednisone                              | <u>10</u>             | 358              | 359          | 400 °C             | <1                | 26                |
|                   | Cortisone                               | <u>10</u>             | 360              | 361          | 400 °C             | <1                | 19                |
|                   | Methylprednisolone                      | <u>10</u>             | 374              | 375          | 400 °C             | <1                | 15                |
|                   | Dexamethasone                           | <u>10</u>             | 392              | 393          | 400 °C             | <1                | 21                |
|                   | Prednisone acetate                      | <u>10</u>             | 400              | 401          | 400 °C             | <1                | 59                |

|  |                            |           |     |     |        |     |      |
|--|----------------------------|-----------|-----|-----|--------|-----|------|
|  | Prednisolone acetate       | <u>10</u> | 402 | 403 | 400 °C | <1  | 39   |
|  | Betamethasone dipropionate | <u>10</u> | 504 | 505 | 400 °C | <1  | 13   |
|  | Beclometasone dipropionate | <u>10</u> | 520 | 521 | 400 °C | <1  | 9    |
|  | Glibenclamide              | <u>10</u> | 493 | 494 | 400 °C | <1  | 24   |
|  | Metronidazole              | <u>10</u> | 171 | 172 | 400 °C | 4   | 712  |
|  | Prednisolone               | <u>10</u> | 360 | 361 | 400 °C | <1  | 73   |
|  | Phenanthrene               | <u>10</u> | 178 | 179 | 400 °C | <1  | 50   |
|  | Carbazole                  | <u>10</u> | 167 | 168 | 400 °C | <1  | 15   |
|  | Fluorescein                | <u>1</u>  | 332 | 333 | 400 °C | 26  | 36   |
|  | Sudan III                  | <u>5</u>  | 352 | 353 | 400 °C | 294 | 2137 |
|  | Rosiglitazone              | <u>10</u> | 357 | 358 | 400 °C | <1  | 161  |
|  | Gliquidone                 | <u>10</u> | 527 | 528 | 400 °C | <1  | 5    |
|  | Gliclazide                 | <u>10</u> | 323 | 324 | 400 °C | <1  | 130  |
|  | Nateglinide                | <u>10</u> | 317 | 318 | 400 °C | <1  | 235  |
|  | Glipizide                  | <u>10</u> | 445 | 446 | 400 °C | <1  | 19   |

\* The ion of 126 was obtained due to the loss of SO<sub>2</sub> of 2-Cyclohexylamino-ethanesulfonic acid

\*\* Artemisinin was detected in the form of [M+NH<sub>4</sub>]<sup>+</sup>=300

**Figure S1** Comparisons of the performance of five different types of pencil with three compounds under visible laser (532 nm). a) Extracted ion chromatogram (EIC) of 2-(phenylamino) benzoic acid ( $[M-H]^- = 212$ ) was detected in negative ion mode at 25 °C. b) EIC of Tetradecanoic acid ( $[M-H]^- = 227$ ) was detected in negative ion mode at 25 °C. c) EIC of Benzanilide ( $[M+H]^+ = 195$ ) was detected in positive ion mode at 25 °C.

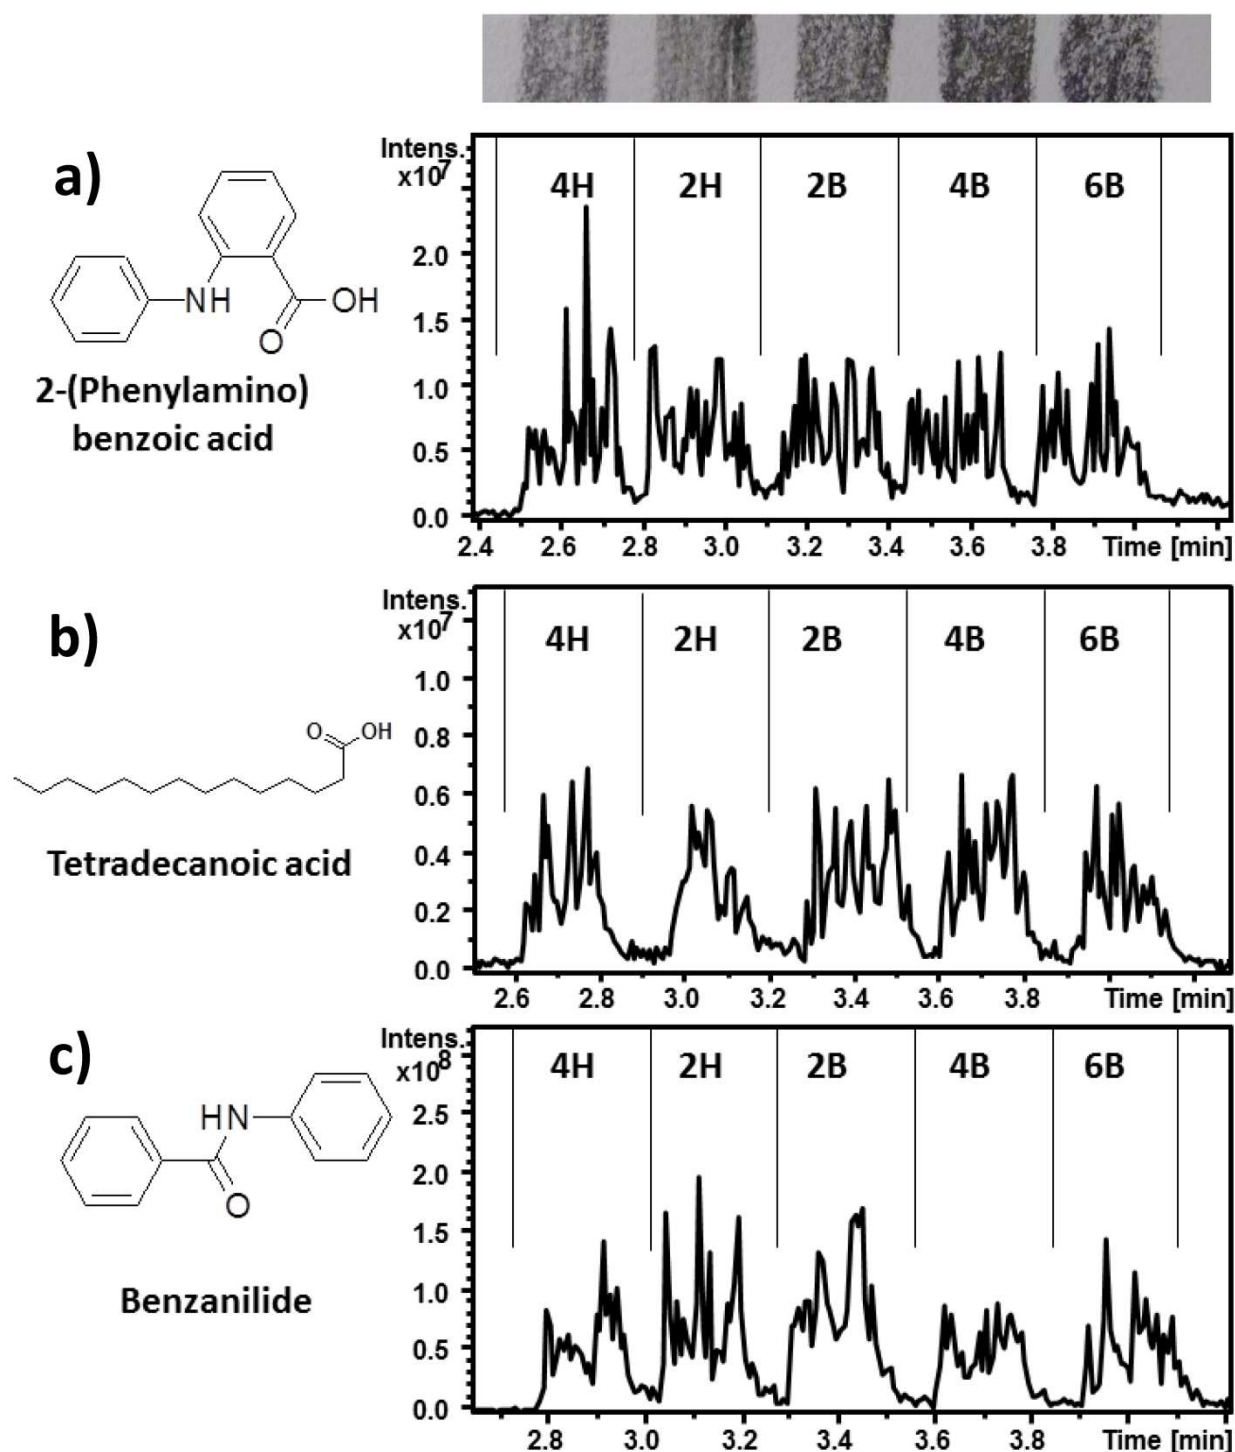

**Figure S2** Comparisons of the performance of three different brands of pencil with two compounds under visible laser (532 nm). a) EIC of Tetradecanoic acid ( $[M-H]^- = 227$ ) was detected in negative ion mode. b) EIC of Benzanilide ( $[M+H]^+ = 195$ ) was detected in positive ion mode.

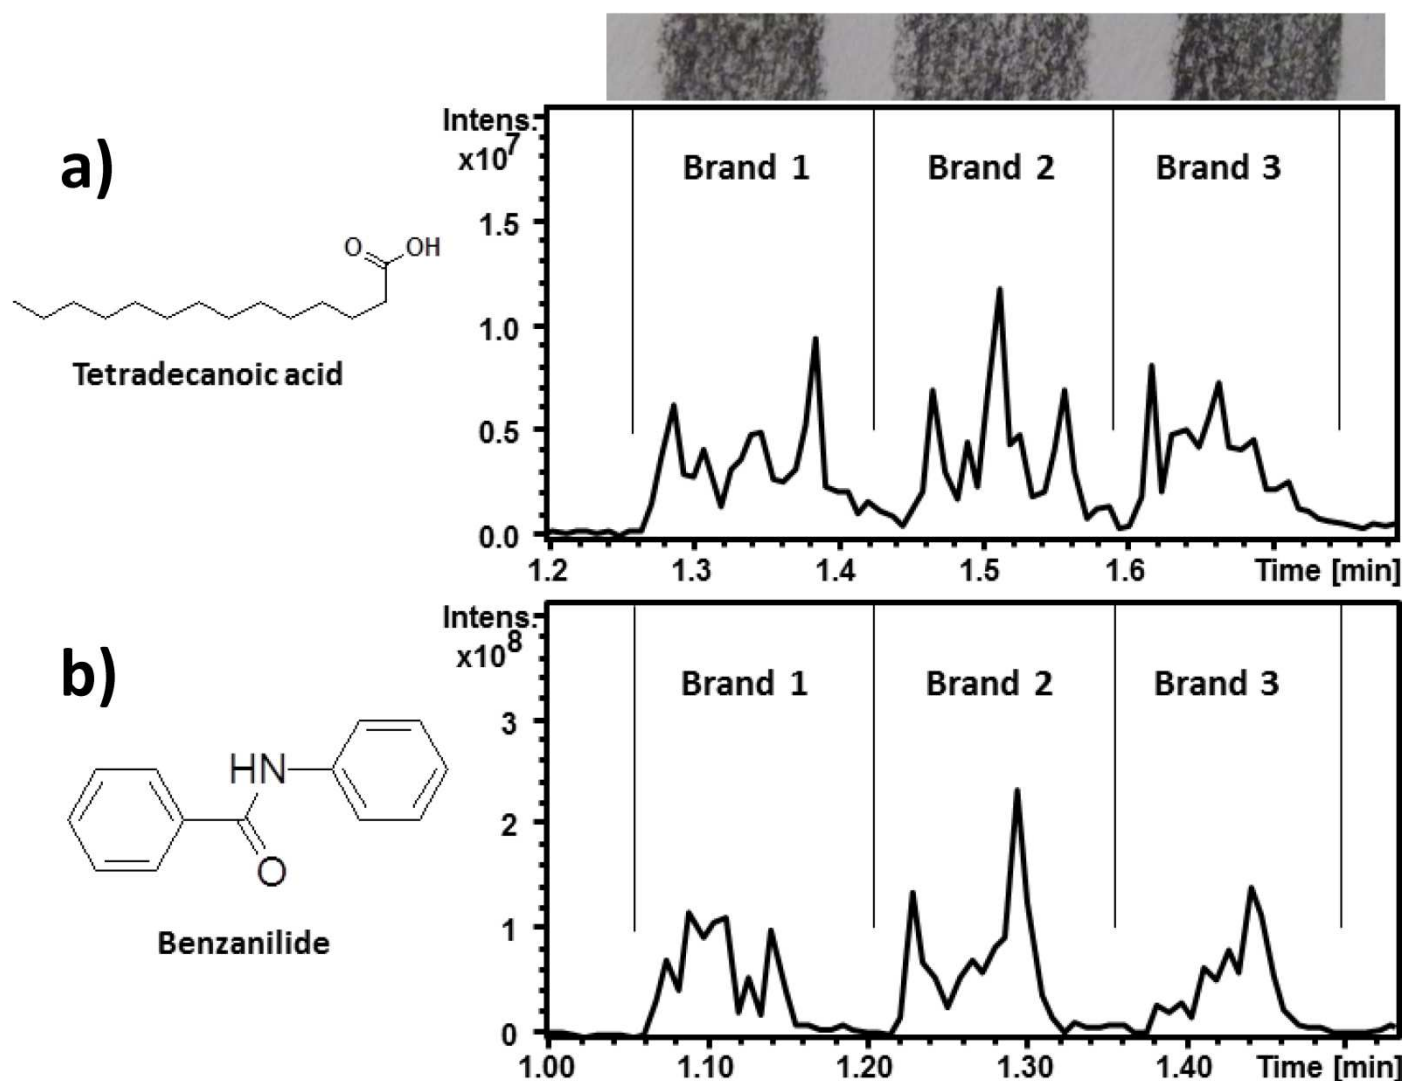

**Figure S3** Comparisons of the performance of different thickness of pencil with two compounds under visible laser (532 nm). a) EIC of Tetradecanoic acid ( $[M-H]^- = 227$ ) was detected in negative ion mode. b) EIC of Benzanilide ( $[M+H]^+ = 195$ ) was detected in positive ion mode.

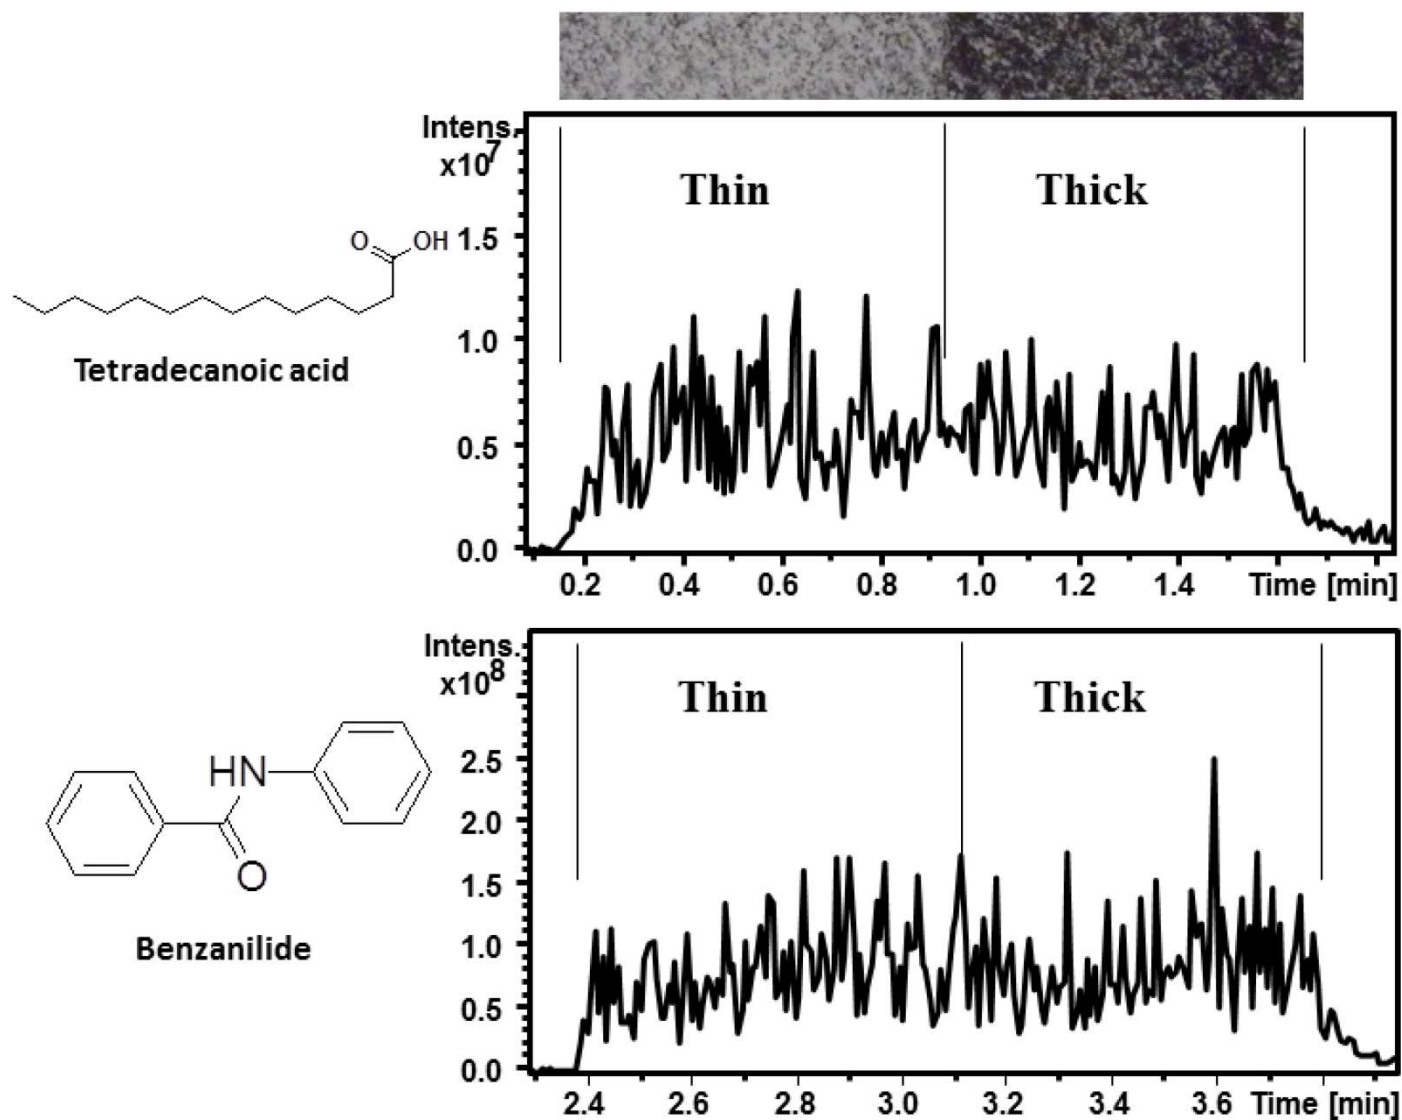

**Figure S4** Mass spectra of hippuric acid and benzanilide in two bands under 532 nm of laser (0~0.3 was white band; and 0.3~0.6 was black band) using microcrystalline cellulose-coated TLC plate as the medium for sample loading. a) Extracted ion chromatography of hippuric acid ( $M_r=179$ ) in negative ion mode. b) Averaged mass spectrum of white band, on which no graphite was drawn. c) Averaged mass spectrum of black band, on which graphite was painted. d) Extracted ion chromatography of 4-aminoantipyrine ( $M_r=197$ ) in positive ion mode. e) Averaged mass spectrum of white band. f) Averaged mass spectrum of black band.

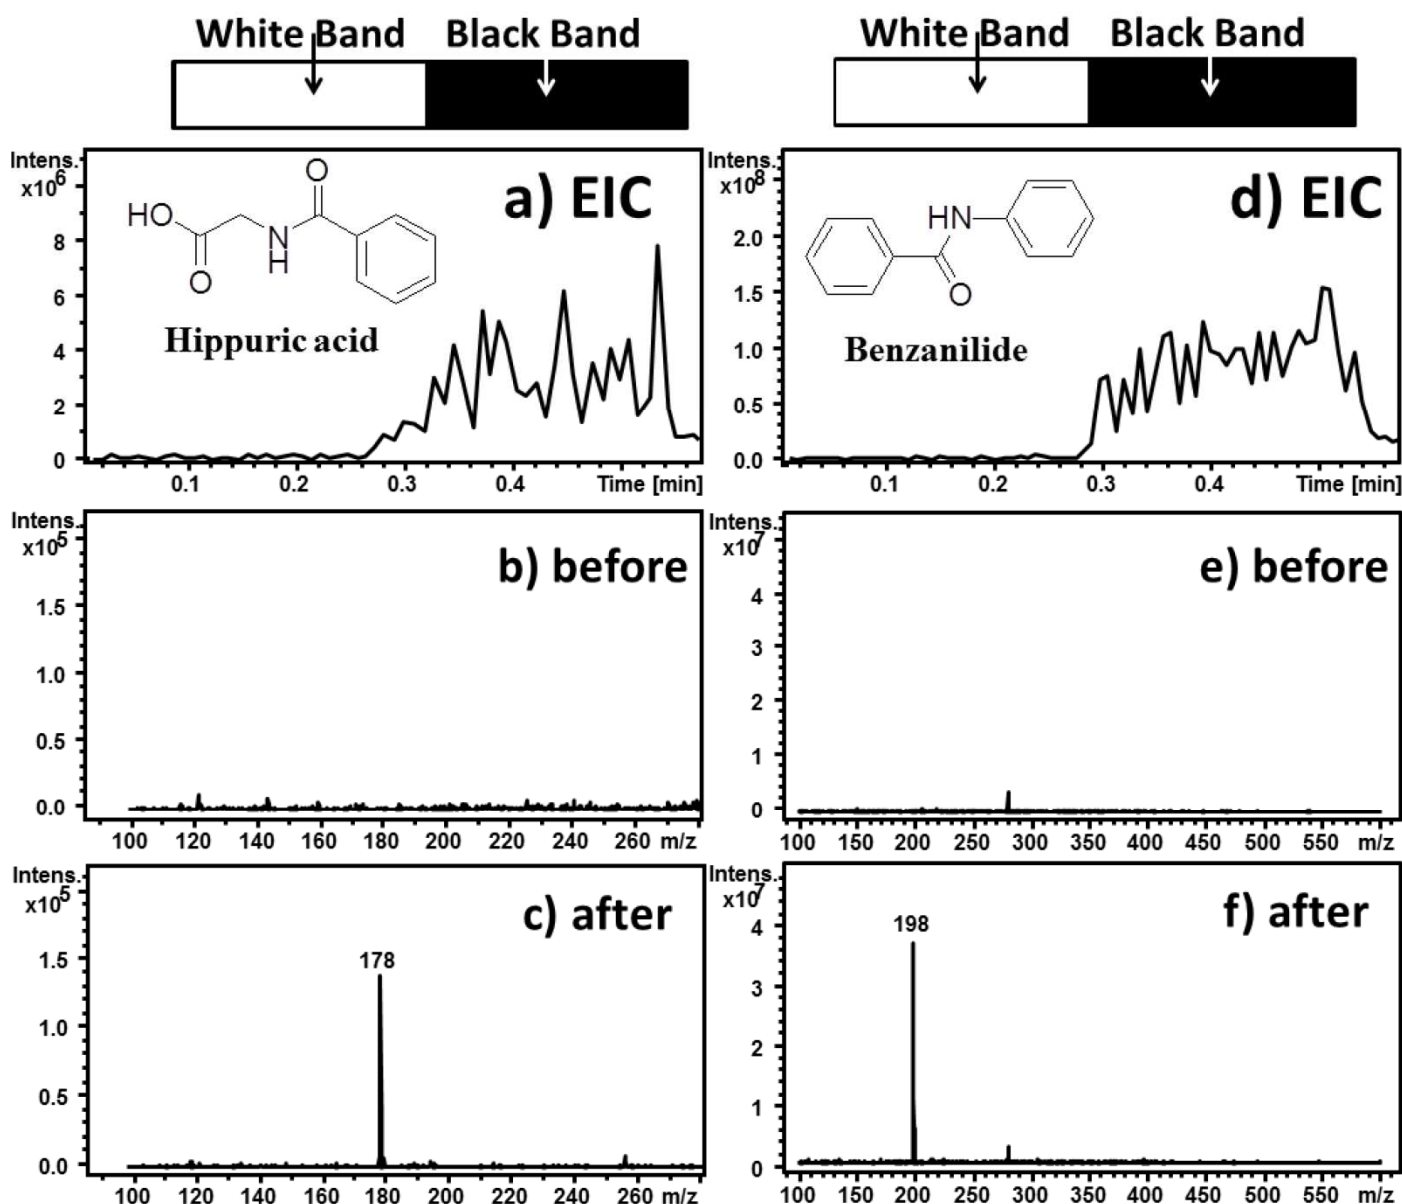



**Figure S5** SEM images of graphite-attached cellulose-coated TLC plate with different magnification times. a) 100  $\mu\text{m}$ , b) 50  $\mu\text{m}$ , c) 10  $\mu\text{m}$ , d) 5  $\mu\text{m}$

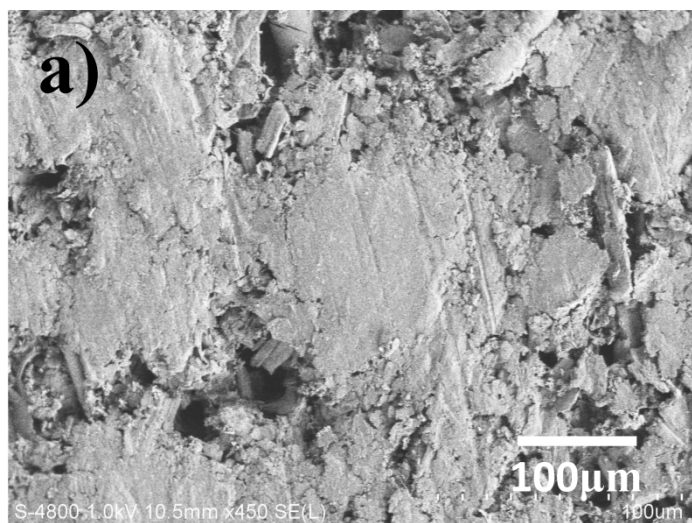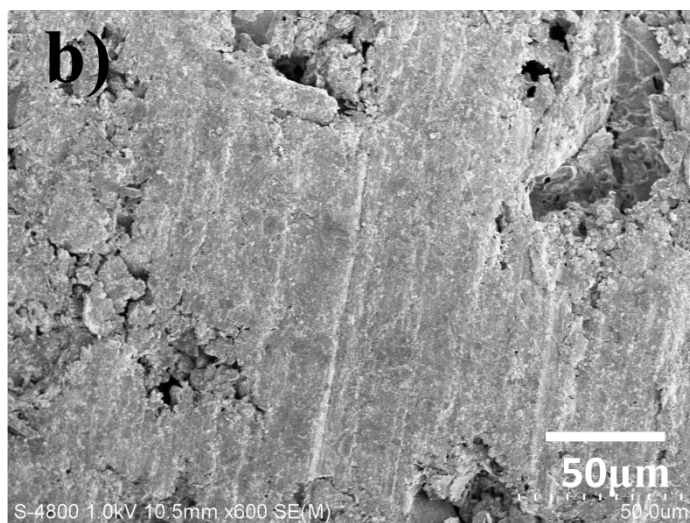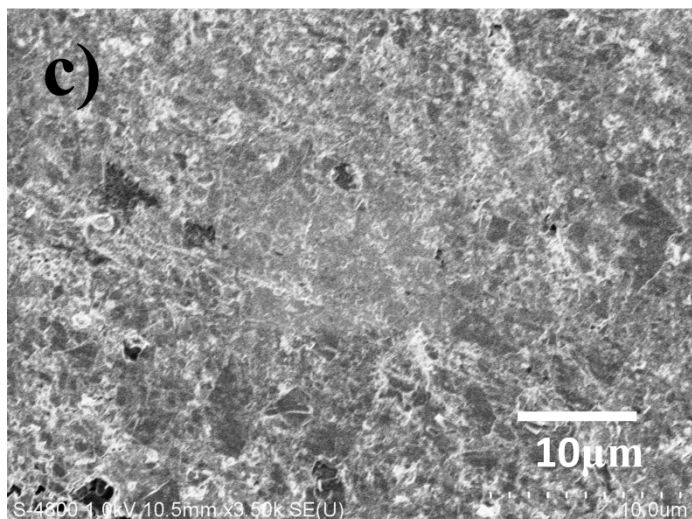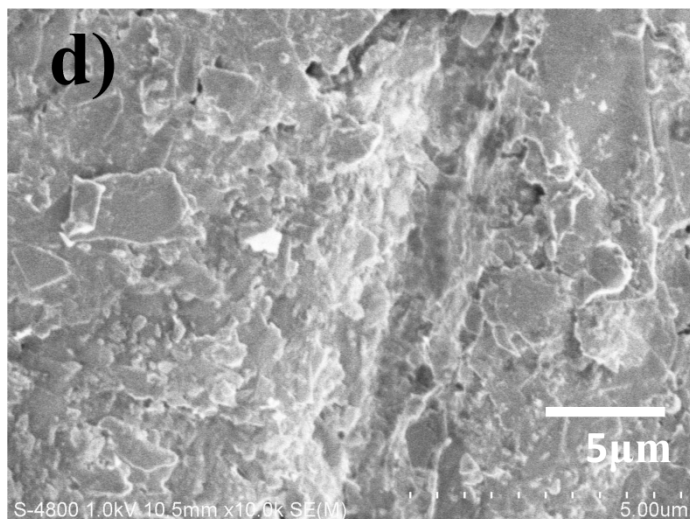



**Figure S6** Mass spectra of 1-benzoylnaphthalene and anthranone in two bands under 355 nm of laser (0~0.3 was white band; and 0.3~0.6 was black band) using paper as the medium for sample loading. a) Extracted ion chromatography of 1-benzoylnaphthalene ( $[M+H]^+=233$ ) in positive ion mode. b) Extracted ion chromatography of anthranone ( $[M+H]^+=195$ ) in positive ion mode.

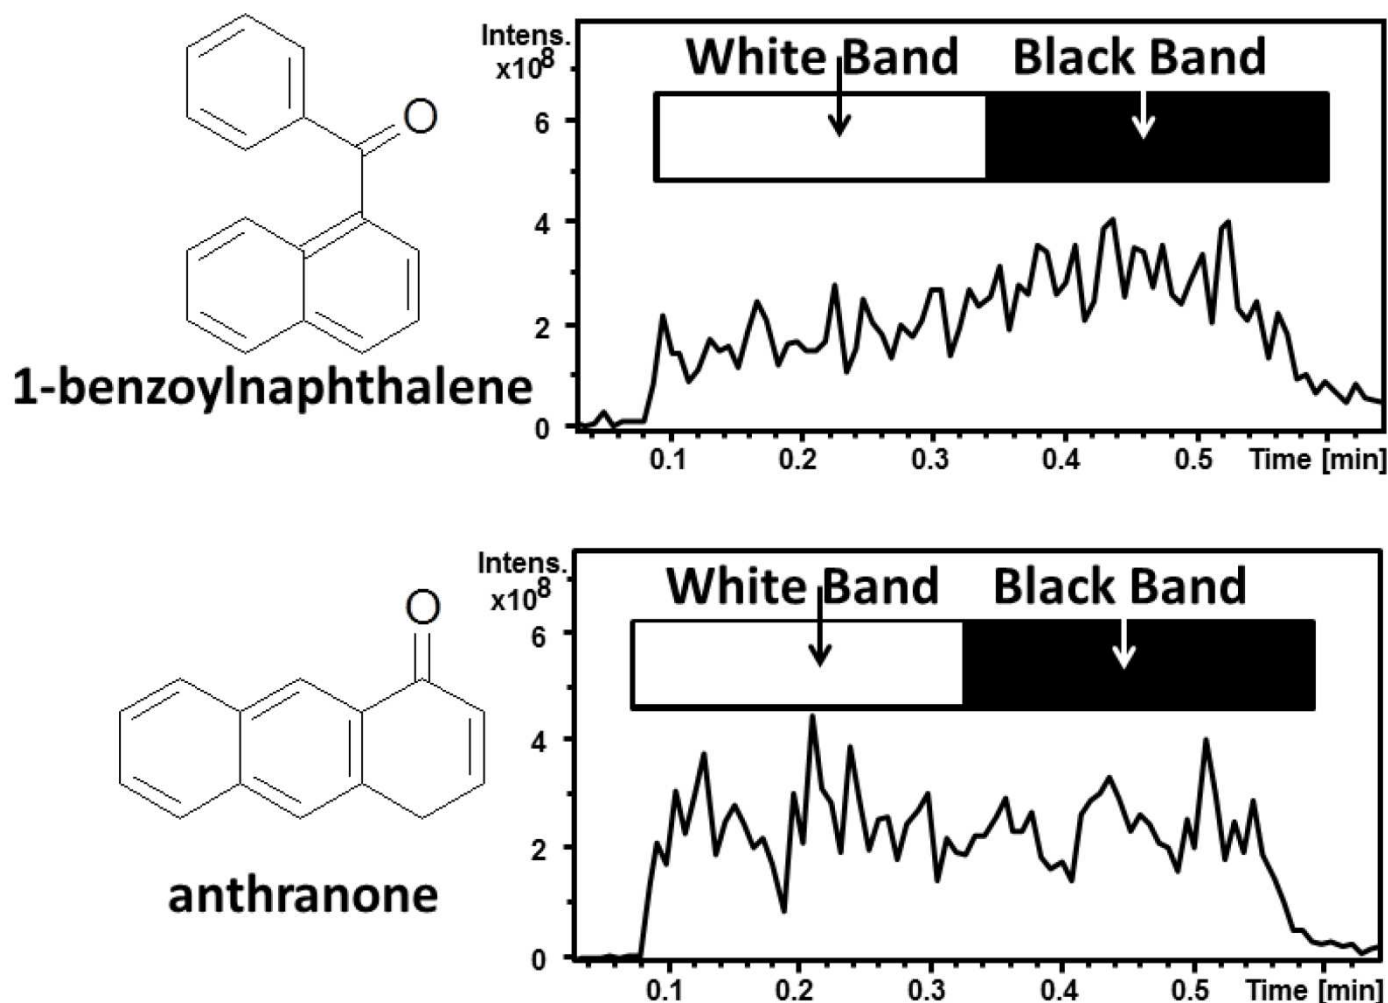

Supplement: Supplementary file 1 [file 4178335]
